# Supplementary material
Source: PubMed Central journal article supplement (PMC2516262)
Supplement: 0801617105_0801617105SI.pdf [file 0801617105_0801617105SI.pdf]

# Supporting Information

Liu et al. 10.1073/pnas.0801617105

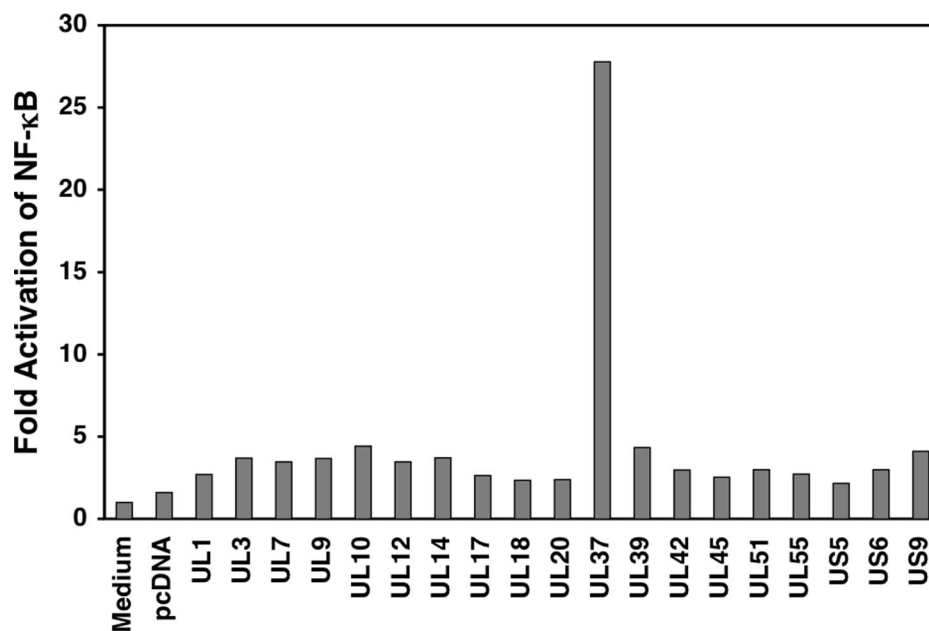

**Fig. S1.** Screening of HSV proteins for activation of NF- $\kappa$ B in 293 human embryonic kidney cells (HEK293). Twenty nanograms of plasmids encoding the indicated HSV proteins was cotransfected with 20 ng of NF- $\kappa$ B firefly luciferase reporter plasmid and 5 ng of thymidine kinase-*Renilla* luciferase control plasmid into HEK293 cells with Genejuice (Novagen) transfection reagent. At 24 h after transfection, the firefly and *Renilla* luciferase activities were measured using the Promega dual-glo luciferase assay system. For each experimental sample the ratio of firefly to *Renilla* luciferase activity was calculated (relative light units) and normalized to the medium-alone value to give the NF- $\kappa$ B Fold Activation values shown. The data points shown are the average of triplicate culture wells.

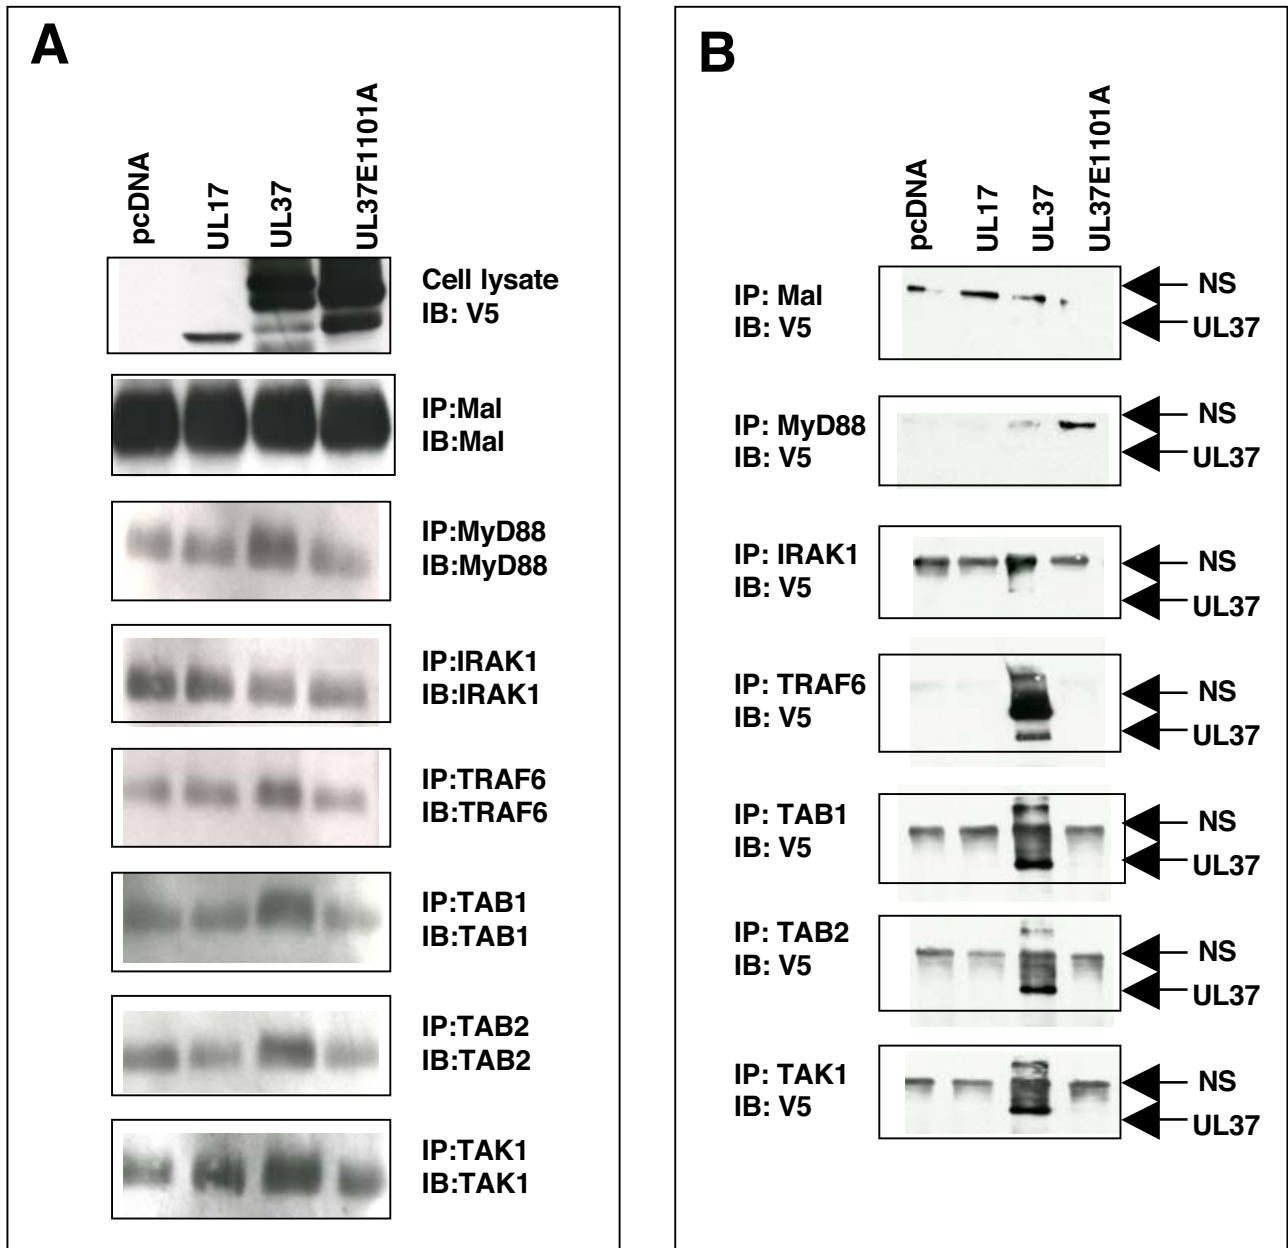

**Fig. S2.**  $U_L37$  interacts with IRAK1, TAK1, TAB1, and TAB2 through TRAF6. HEK293 cells were transfected with plasmids encoding the HSV  $U_L37$ ,  $U_L37$  E1101A, or  $U_L17$  proteins or an empty vector. At 24 h, cells were lysed, and endogenous MAL, MyD88, IRAK1, TRAF6, TAB1, TAB2, and TAK1 were immunoprecipitated with the indicated rabbit anti-human polyclonal antibodies. (A *Upper*) Expression of the HSV proteins in total cell lysates was confirmed by Western blotting with anti-V5 epitope specific antibody. (Lower) The immunoprecipitation of cellular proteins was confirmed by Western blotting with the relevant antibodies specific for MAL, MyD88, TRAF6, TAB1, TAB2, or TAK1. (B) Coprecipitation of  $U_L17$ ,  $U_L37$ , or  $U_L37$  E1101A with cellular proteins was tested by Western blotting of the immunoprecipitated proteins with anti-V5 antibody.
